# Supplementary material for: Genome-wide compound heterozygote analysis highlights alleles associated with adult height in Europeans
Source: PubMed Central journal article supplement (PMC5702380; doi:10.1007/s00439-017-1842-3), 2017-09-18

Compare R2 of linear models using single SNP, collapsed genotype or both SNPs as independent variables.

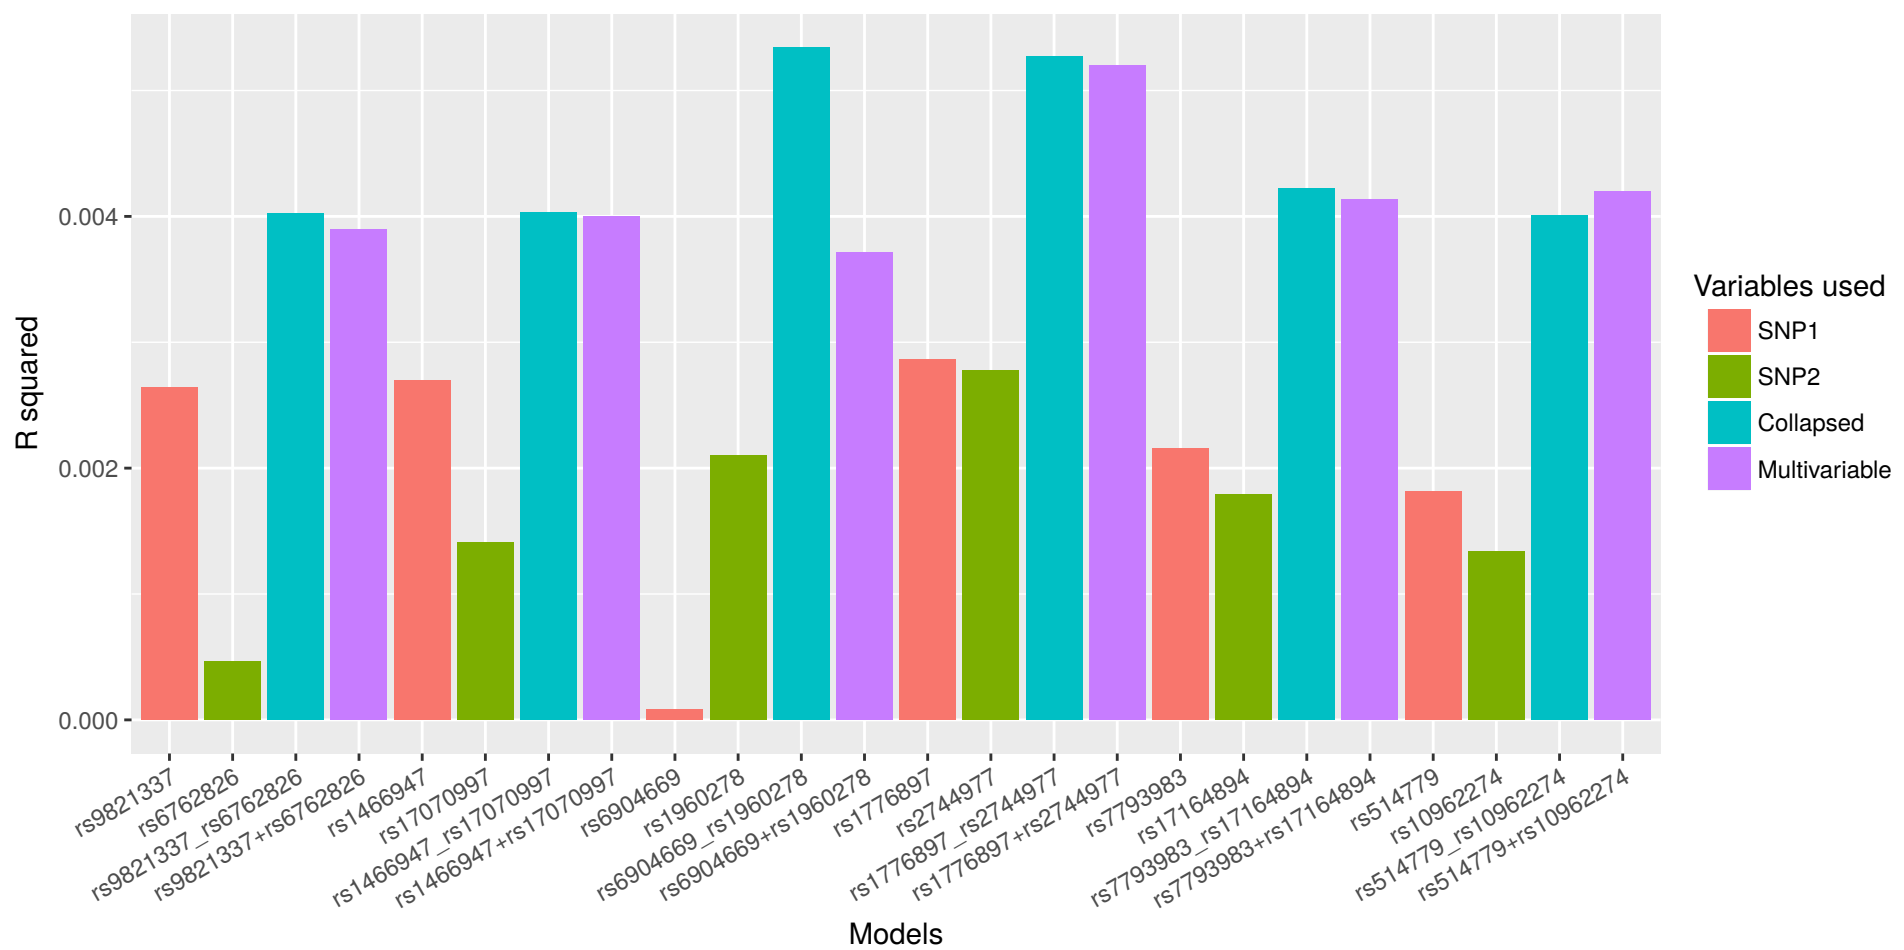

Supplement: 439_2017_1842_MOESM6_ESM.pdf [file 439_2017_1842_MOESM6_ESM.pdf]
